# Supplementary material for: First-principles calculations on the deposition behavior of LixNay (x + y ≤ 5) clusters during the hybrid storage of Li and Na atoms on graphene
Source: Royal Society of Chemistry journal article supplement (doi:10.1039/d1cp01237a), 2021-01-01
Supplement: d1cp01237a1.pdf [file d1cp01237a1.pdf]

## First-principles calculation on the deposition behavior of $\text{Li}_x\text{Na}_y$ ( $x+y \leq 5$ ) clusters during the hybrid storage of Li and Na atoms on graphene

Ding Shen<sup>a,b</sup>, Yaohan Liu<sup>a</sup>, Mingyue Li<sup>a</sup>, Wei Dong<sup>a</sup>, Fang Yang<sup>a</sup>, Laigui Wang<sup>b</sup>, Shaobin Yang<sup>a</sup>, Wen Sun<sup>\*a,c</sup>

Table S1. Adsorption energies of single Li atom and Na atom on graphene calculated from different methods including GGA-PBE, TS, Grimme. (Unit: eV)

|            | Li atom |        |        | Na atom |        |        |
|------------|---------|--------|--------|---------|--------|--------|
|            | H       | B      | T      | H       | B      | T      |
| PBE        | -1.555  | -1.276 | -1.246 | -0.916  | -0.799 | -0.788 |
| PBE-TS     | -1.817  | -1.517 | -1.497 | -1.211  | -1.143 | -1.142 |
| PBE-Grimme | -1.901  | -1.527 | -1.526 | -1.267  | -1.094 | 1.089  |

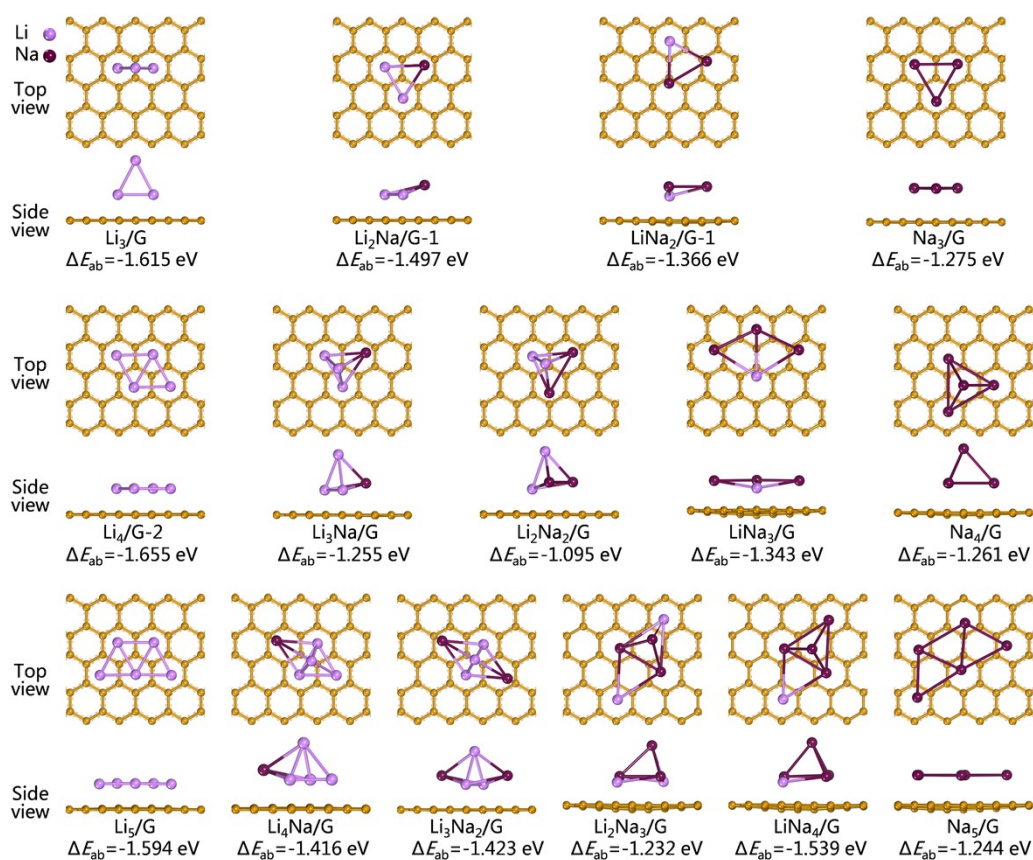

Figure S1 The metastable configurations of  $\text{Li}_x\text{Na}_y$  clusters on graphene

Table S2 Atomic coordinates and electronic states of the clusters of the relatively stable  $\text{Li}_x\text{Na}_y$  clusters on graphene

| System                 | Li/G                        | Na/G                       | LiNa/G                      | Li2Na/G                                                                    | Li3Na/G                                                                    | Li4Na/G                                                                                            |
|------------------------|-----------------------------|----------------------------|-----------------------------|----------------------------------------------------------------------------|----------------------------------------------------------------------------|----------------------------------------------------------------------------------------------------|
| Point group of cluster |                             |                            |                             | C2v                                                                        | C3v                                                                        | C2v                                                                                                |
| Electron configuration | $(1s)^2(2s)^1$              | $(1s)^2(2s)^2(2p)^6(3s)^1$ | like single Li or Na atom   | $(1a_1)^2(2a_1)^2(3a_1)^2(1b_2)^2(2b_2)^2(1b_1)^2(4a_1)^2(5a_1)^2(6a_1)^1$ | $(1a_1)^2(2a_1)^2(2a_1)^2(1e)^2(1e)^2(2e)^2(2e)^2(3a_1)^2(4a_1)^2(5a_1)^2$ | $(1a_1)^2(2a_1)^2(3a_1)^2(1b_1)^2(1b_2)^2(4a_1)^2(2b_1)^2(5a_1)^2(2b_2)^2(6a_1)^2(3b_2)^2(7a_1)^1$ |
| number                 | Atom X Y Z                  | Atom X Y Z                 | Atom X Y Z                  | Atom X Y Z                                                                 | Atom X Y Z                                                                 | Atom X Y Z                                                                                         |
| 1                      | Li1 6.3913 3.6900 11.8030   | Na1 1.4190 -0.0005 9.9990  | Li1 2.1305 11.0699 11.8084  | Li1 6.4934 3.6306 11.9442                                                  | Li1 4.1702 2.3041 11.9342                                                  | Li1 8.6605 2.2152 11.9794                                                                          |
| 2                      | C1 1.4188 -0.0002 9.9986    | C1 0.7090 1.2292 9.9990    | C1 1.4185 0.0043 10.0264    | Li2 4.1573 4.9799 11.9436                                                  | Li2 6.5639 3.6916 11.9318                                                  | Li2 6.2597 3.6105 11.9910                                                                          |
| 3                      | C2 0.7092 1.2288 9.9986     | C2 3.5499 -1.2313 10.0006  | C2 0.7085 1.2319 10.0118    | C1 1.4194 -0.0005 10.0300                                                  | Li3 4.1718 5.0761 11.9338                                                  | Li3 8.6534 4.9922 11.9922                                                                          |
| 4                      | C3 3.5500 -1.2312 9.9994    | C3 2.8388 -0.0022 10.0028  | C3 3.5552 -1.2222 10.0368   | C2 0.7089 1.2286 10.0284                                                   | C1 1.4135 -0.0038 10.0114                                                  | Li4 6.2531 6.3864 11.9806                                                                          |
| 5                      | C4 2.8384 -0.0019 10.0010   | C4 5.6813 -2.4614 9.9990   | C4 2.8398 0.0034 10.0294    | C3 3.5507 -1.2310 10.0302                                                  | C2 0.7031 1.2268 10.0154                                                   | C1 1.4195 -0.0005 9.9948                                                                           |
| 6                      | C5 5.6817 -2.4614 9.9986    | C5 4.9700 -1.2327 10.0028  | C5 5.6858 -2.4593 10.0264   | C4 2.8393 -0.0022 10.0316                                                  | C3 3.5480 -1.2360 10.0108                                                  | C2 0.7102 1.2280 9.9948                                                                            |
| 7                      | C6 4.9704 -1.2328 10.0010   | C6 1.4175 2.4595 10.0028   | C6 4.9743 -1.2290 10.0294   | C5 5.6816 -2.4604 10.0266                                                  | C4 2.8327 -0.0101 10.0192                                                  | C3 3.5487 -1.2321 9.9988                                                                           |
| 8                      | C7 1.4175 2.4591 10.0010    | C7 0.7086 3.6900 10.0006   | C7 1.4187 2.4611 10.0034    | C6 4.9703 -1.2317 10.0286                                                  | C5 5.6808 -2.4626 10.0072                                                  | C4 2.8386 -0.0035 9.9988                                                                           |
| 9                      | C8 0.7088 3.6900 9.9994     | C8 3.5471 1.2274 10.0096   | C8 0.7087 3.6900 9.9980     | C7 1.4176 2.4583 10.0274                                                   | C6 4.9689 -1.2360 10.0160                                                  | C5 5.6805 -2.4617 9.9998                                                                           |
| 10                     | C9 3.5470 1.2272 10.0074    | C9 2.8366 2.4582 10.0096   | C9 3.5487 1.2307 10.0160    | C8 0.7070 3.6889 10.0236                                                   | C7 1.4072 2.4578 10.0352                                                   | C6 4.9684 -1.2342 10.0048                                                                          |
| 11                     | C10 2.8363 2.4582 10.0074   | C10 5.6807 -0.0044 10.0096 | C10 2.8372 2.4601 10.0046   | C9 3.5486 1.2264 10.0328                                                   | C8 0.7003 3.6902 10.0286                                                   | C7 1.4172 2.4585 9.9990                                                                            |
| 12                     | C11 5.6806 -0.0046 10.0074  | C11 4.9672 1.2235 10.0130  | C11 5.6827 -0.0014 10.0160  | C10 2.8361 2.4545 10.0304                                                  | C9 3.5415 1.2179 10.0348                                                   | C8 0.7082 3.6878 9.9990                                                                            |
| 13                     | C12 4.9661 1.2215 10.0126   | C12 1.4175 4.9205 10.0028  | C12 4.9686 1.2259 10.0116   | C11 5.6810 -0.0032 10.0280                                                 | C10 2.8255 2.4540 10.0526                                                  | C9 3.5454 1.2257 10.0134                                                                           |
| 14                     | C13 1.4175 4.9209 10.0010   | C13 0.7090 6.1508 9.9990   | C13 1.4187 4.9189 10.0034   | C12 4.9684 1.2234 10.0308                                                  | C11 5.6827 -0.0106 10.0364                                                 | C10 2.8351 2.4559 10.0136                                                                          |
| 15                     | C14 0.7092 6.1512 9.9986    | C14 3.5432 3.6900 10.0130  | C14 0.7085 6.1481 10.0118   | C13 1.4123 4.9204 10.0212                                                  | C12 4.9700 1.2159 10.0518                                                  | C11 5.6776 -0.0079 10.0230                                                                         |
| 16                     | C15 3.5409 3.6900 10.0126   | C15 2.8365 4.9218 10.0096  | C15 3.5452 3.6900 10.0002   | C14 0.7071 6.1520 10.0176                                                  | C13 1.4072 4.9225 10.0350                                                  | C12 4.9641 1.2202 10.0364                                                                          |
| 17                     | C16 2.8363 4.9218 10.0074   | C16 5.6777 2.4540 10.0058  | C16 2.8372 4.9199 10.0046   | C15 3.5439 3.6858 10.0212                                                  | C14 0.7031 6.1536 10.0150                                                  | C13 1.4163 4.9182 10.0054                                                                          |
| 18                     | C17 5.6767 2.4523 10.0070   | C17 4.9641 3.6900 10.0058  | C17 5.6784 2.4553 9.9950    | C16 2.8327 4.9207 10.0130                                                  | C15 3.5385 3.6902 10.0772                                                  | C14 0.7093 6.1487 10.0000                                                                          |
| 19                     | C18 4.9621 3.6900 10.0070   | C18 7.8121 -3.6900 9.9984  | C18 4.9653 3.6900 9.9932    | C17 5.6809 2.4520 10.0218                                                  | C16 2.8255 4.9264 10.0524                                                  | C15 3.5398 3.6872 10.0372                                                                          |
| 20                     | C19 7.8117 -3.6900 9.9986   | C19 7.1012 -2.4614 9.9990  | C19 7.8134 -3.6900 10.0056  | C18 4.9692 3.6870 10.0198                                                  | C17 5.6837 2.4516 10.0762                                                  | C16 2.8330 4.9193 10.0240                                                                          |
| 21                     | C20 7.1008 -2.4614 9.9986   | C20 9.9423 -4.9194 9.9998  | C20 7.1039 -2.4605 10.0118  | C19 7.8121 -3.6894 10.0274                                                 | C18 4.9686 3.6902 10.0814                                                  | C17 5.6707 2.4484 10.0720                                                                          |
| 22                     | C21 9.9422 -4.9196 10.0000  | C21 9.2320 -3.6900 9.9998  | C21 9.9422 -4.9196 9.9938   | C20 7.1013 -2.4606 10.0262                                                 | C19 7.8108 -3.6898 10.0040                                                 | C18 4.9567 3.6851 10.0726                                                                          |
| 23                     | C22 9.2317 -3.6900 10.0002  | C22 12.0721 -6.1495 9.9984 | C22 9.2325 -3.6900 9.9948   | C21 9.9422 -4.9192 10.0274                                                 | C20 7.1001 -2.4619 10.0080                                                 | C19 7.8125 -3.6900 9.9994                                                                          |
| 24                     | C23 12.0723 -6.1499 9.9986  | C23 11.3622 -4.9199 9.9998 | C23 12.0715 -6.1484 10.0056 | C22 9.2320 -3.6896 10.0262                                                 | C21 9.9399 -4.9192 10.0024                                                 | C20 7.0997 -2.4626 9.9988                                                                          |
| 25                     | C24 11.3623 -4.9201 10.0002 | C24 7.8126 -1.2327 10.0028 | C24 11.3619 -4.9194 9.9948  | C23 12.0718 -6.1498 10.0266                                                | C22 9.2302 -3.6898 10.0020                                                 | C21 9.9438 -4.9185 10.0060                                                                         |
| 26                     | C25 7.8122 -1.2328 10.0010  | C25 7.1018 -0.0044 10.0096 | C25 7.8133 -1.2308 10.0034  | C24 11.3618 -4.9204 10.0260                                                | C23 12.0675 -6.1502 10.0058                                                | C22 9.2317 -3.6909 10.0002                                                                         |
| 27                     | C26 7.1019 -0.0046 10.0074  | C26 9.9423 -2.4606 9.9998  | C26 7.1032 -0.0029 10.0046  | C25 7.8122 -1.2316 10.0246                                                 | C24 11.3585 -4.9206 10.0052                                                | C23 12.0736 -6.1491 9.9996                                                                         |
| 28                     | C27 9.9422 -2.4604 10.0000  | C27 9.2326 -1.2313 10.0006 | C27 9.9422 -2.4604 9.9938   | C26 7.1021 -0.0032 10.0246                                                 | C25 7.8118 -1.2332 10.0146                                                 | C24 11.3635 -4.9205 9.9994                                                                         |
| 29                     | C28 9.2325 -1.2312 9.9994   | C28 12.0717 -3.6900 9.9998 | C28 9.2326 -1.2313 9.9980   | C27 9.9420 -2.4599 10.0236                                                 | C26 7.1033 -0.0066 10.0314                                                 | C25 7.8117 -1.2366 10.0046                                                                         |
| 30                     | C29 12.0719 -3.6900 10.0000 | C29 11.3622 -2.4601 9.9998 | C29 12.0719 -3.6900 9.9938  | C28 9.2323 -1.2304 10.0222                                                 | C27 9.9399 -2.4604 10.0026                                                 | C26 7.0977 -0.0116 10.0260                                                                         |
| 31                     | C30 11.3623 -2.4599 10.0002 | C30 7.8153 1.2235 10.0130  | C30 11.3619 -2.4606 9.9948  | C29 12.0706 -3.6902 10.0240                                                | C28 9.2317 -1.2311 10.0076                                                 | C27 9.9431 -2.4635 9.9974                                                                          |
| 32                     | C31 7.8164 1.2215 10.0126   | C31 7.1048 2.4540 10.0058  | C31 7.8143 1.2252 10.0002   | C30 11.3617 -2.4598 10.0218                                                | C29 12.0665 -3.6898 10.0110                                                | C28 9.2325 -1.2373 10.0018                                                                         |
| 33                     | C32 7.1059 2.4523 10.0070   | C32 9.9438 -0.0022 10.0028 | C32 7.1043 2.4551 9.9932    | C31 7.8159 1.2233 10.0226                                                  | C30 11.3585 -2.4590 10.0052                                                | C29 12.0722 -3.6915 9.9966                                                                         |
| 34                     | C33 9.9441 -0.0019 10.0010  | C33 9.2354 1.2274 10.0096  | C33 9.9418 -0.0019 10.0034  | C32 7.1059 2.4536 10.0142                                                  | C31 7.8168 1.2219 10.0366                                                  | C30 11.3628 -2.4629 9.9966                                                                         |

|    |                            |                            |                             |                             |                             |                             |
|----|----------------------------|----------------------------|-----------------------------|-----------------------------|-----------------------------|-----------------------------|
| 35 | C34 9.2356 1.2272 10.0074  | C34 12.0721 -1.2305 9.9984 | C34 9.2334 1.2270 10.0046   | C33 9.9431 -0.0011 10.0188  | C32 7.1108 2.4522 10.0518   | C31 7.8105 1.2152 10.0474   |
| 36 | C35 12.0723 -1.2301 9.9986 | C35 11.3635 -0.0005 9.9990 | C35 12.0715 -1.2316 10.0056 | C34 9.2351 1.2284 10.0188   | C33 9.9417 -0.0022 10.0082  | C32 7.0978 2.4465 10.0960   |
| 37 | C36 11.3638 -0.0002 9.9986 | C36 1.4190 7.3805 9.9990   | C36 11.3614 -0.0024 10.0118 | C35 12.0708 -1.2296 10.0182 | C34 9.2350 1.2275 10.0172   | C33 9.9473 -0.0112 10.0088  |
| 38 | C37 1.4188 7.3802 9.9986   | C37 0.7104 8.6105 9.9984   | C37 1.4185 7.3757 10.0264   | C36 11.3626 0.0007 10.0170  | C35 12.0675 -1.2294 10.0058 | C34 9.2388 1.2161 10.0236   |
| 39 | C38 0.7102 8.6101 9.9986   | C38 3.5471 6.1526 10.0096  | C38 0.7055 8.6019 10.0328   | C37 1.4174 7.3823 10.0174   | C36 11.3607 0.0011 10.0038  | C35 12.0732 -1.2337 9.9974  |
| 40 | C39 3.5470 6.1528 10.0074  | C39 2.8388 7.3822 10.0028  | C39 3.5487 6.1493 10.0160   | C38 0.7094 8.6118 10.0180   | C37 1.4136 7.3842 10.0108   | C36 11.3665 -0.0052 10.0020 |
| 41 | C40 2.8384 7.3819 10.0010  | C40 5.6777 4.9260 10.0058  | C40 2.8398 7.3766 10.0294   | C39 3.5465 6.1570 10.0128   | C38 0.7067 8.6127 10.0032   | C37 1.4181 7.3782 9.9992    |
| 42 | C41 5.6767 4.9277 10.0070  | C41 4.9672 6.1565 10.0130  | C41 5.6784 4.9246 9.9950    | C40 2.8366 7.3873 10.0208   | C39 3.5415 6.1625 10.0342   | C38 0.7116 8.6092 9.9992    |
| 43 | C42 4.9661 6.1585 10.0126  | C42 1.4204 9.8401 9.9998   | C42 4.9686 6.1542 10.0116   | C41 5.6832 4.9236 10.0196   | C40 2.8328 7.3904 10.0186   | C39 3.5398 6.1509 10.0278   |
| 44 | C43 1.4202 9.8399 10.0002  | C43 0.7109 11.0700 9.9998  | C43 1.4157 9.8321 10.0292   | C42 4.9716 6.1586 10.0206   | C41 5.6837 4.9287 10.0754   | C40 2.8359 7.3818 10.0058   |
| 45 | C44 0.7106 11.0700 10.0000 | C44 3.5499 8.6113 10.0006  | C44 0.7012 11.0700 10.0306  | C43 1.4202 9.8410 10.0212   | C42 4.9700 6.1644 10.0510   | C41 5.6686 4.9219 10.0974   |
| 46 | C45 3.5500 8.6112 9.9994   | C45 2.8402 9.8406 9.9998   | C45 3.5552 8.6022 10.0368   | C44 0.7105 11.0706 10.0232  | C43 1.4178 9.8414 10.0018   | C42 4.9586 6.1548 10.0498   |
| 47 | C46 2.8403 9.8404 10.0000  | C46 5.6807 7.3844 10.0096  | C46 2.8450 9.8323 10.0306   | C45 3.5504 8.6139 10.0230   | C44 0.7083 11.0702 10.0016  | C43 1.4204 9.8387 10.0002   |
| 48 | C47 5.6806 7.3846 10.0074  | C47 4.9700 8.6127 10.0028  | C47 5.6827 7.3814 10.0160   | C46 2.8402 9.8423 10.0236   | C45 3.5480 8.6163 10.0104   | C44 0.7134 11.0692 10.0056  |
| 49 | C48 4.9704 8.6128 10.0010  | C48 1.4204 12.2999 9.9998  | C48 4.9743 8.6090 10.0294   | C47 5.6840 7.3871 10.0292   | C46 2.8375 9.8427 10.0028   | C45 3.5457 8.6126 10.0032   |
| 50 | C49 1.4202 12.3001 10.0002 | C49 0.7104 13.5295 9.9984  | C49 1.4157 12.3079 10.0292  | C48 4.9714 8.6138 10.0262   | C47 5.6827 7.3909 10.0354   | C46 2.8391 9.8410 9.9980    |
| 51 | C50 0.7102 13.5299 9.9986  | C50 3.5506 11.0700 9.9998  | C50 0.7055 13.5381 10.0328  | C49 1.4204 12.3003 10.0264  | C48 4.9689 8.6164 10.0154   | C47 5.6735 7.3913 10.0264   |
| 52 | C51 3.5508 11.0700 10.0002 | C51 2.8402 12.2994 9.9998  | C51 3.5598 11.0700 10.0292  | C50 0.7102 13.5298 10.0278  | C49 1.4178 12.2989 10.0018  | C48 4.9649 8.6185 10.0108   |
| 53 | C52 2.8403 12.2996 10.0000 | C52 5.6813 9.8414 9.9990   | C52 2.8450 12.3077 10.0306  | C51 3.5512 11.0712 10.0258  | C50 0.7067 13.5276 10.0034  | C49 1.4214 12.2997 9.9994   |
| 54 | C53 5.6817 9.8414 9.9986   | C53 4.9704 11.0700 9.9984  | C53 5.6858 9.8393 10.0264   | C52 2.8404 12.3000 10.0278  | C51 3.5496 11.0702 10.0022  | C50 0.7125 13.5289 9.9994   |
| 55 | C54 4.9709 11.0700 9.9986  | C54 7.8184 3.6900 10.0058  | C54 4.9803 11.0700 10.0328  | C53 5.6821 9.8423 10.0272   | C52 2.8375 12.2976 10.0030  | C51 3.5494 11.0703 9.9968   |
| 56 | C55 7.8205 3.6900 10.0070  | C55 7.1048 4.9260 10.0058  | C55 7.8169 3.6900 9.9950    | C54 4.9709 11.0710 10.0262  | C53 5.6808 9.8430 10.0070   | C52 2.8400 12.2989 9.9966   |
| 57 | C56 7.1059 4.9277 10.0070  | C56 9.9460 2.4582 10.0096  | C56 7.1043 4.9249 9.9932    | C55 7.8197 3.6899 10.0140   | C54 4.9685 11.0702 10.0034  | C53 5.6797 9.8447 10.0032   |
| 58 | C57 9.9462 2.4582 10.0074  | C57 9.2393 3.6900 10.0130  | C57 9.9424 2.4579 10.0160   | C56 7.1085 4.9248 10.0214   | C55 7.8233 3.6902 10.0344   | C54 4.9691 11.0709 9.9980   |
| 59 | C58 9.2416 3.6900 10.0126  | C58 12.0735 1.2292 9.9990  | C58 9.2366 3.6900 10.0116   | C57 9.9454 2.4587 10.0184   | C56 7.1108 4.9282 10.0512   | C55 7.8126 3.6861 10.1222   |
| 60 | C59 12.0733 1.2288 9.9986  | C59 11.3650 2.4595 10.0028 | C59 12.0695 1.2263 10.0264  | C58 9.2401 3.6902 10.0220   | C57 9.9454 2.4580 10.0122   | C56 7.0996 4.9211 10.1228   |
| 61 | C60 11.3650 2.4591 10.0010 | C60 7.8153 6.1565 10.0130  | C60 11.3597 2.4577 10.0294  | C59 12.0724 1.2300 10.0168  | C58 9.2412 3.6902 10.0198   | C57 9.9537 2.4525 10.0484   |
| 62 | C61 7.8164 6.1585 10.0126  | C61 7.1018 7.3844 10.0096  | C61 7.8143 6.1548 10.0002   | C60 11.3641 2.4603 10.0184  | C59 12.0701 1.2299 10.0030  | C58 9.2436 3.6853 10.0970   |
| 63 | C62 7.1019 7.3846 10.0074  | C62 9.9460 4.9218 10.0096  | C62 7.1032 7.3829 10.0046   | C61 7.8163 6.1561 10.0298   | C60 11.3629 2.4602 10.0042  | C59 12.0763 1.2256 10.0052  |
| 64 | C63 9.9462 4.9218 10.0074  | C63 9.2354 6.1526 10.0096  | C63 9.9424 4.9221 10.0160   | C62 7.1038 7.3842 10.0314   | C61 7.8168 6.1585 10.0358   | C60 11.3725 2.4565 10.0272  |
| 65 | C64 9.2356 6.1528 10.0074  | C64 12.0739 3.6900 10.0006 | C64 9.2334 6.1530 10.0046   | C63 9.9454 4.9217 10.0238   | C62 7.1033 7.3870 10.0306   | C61 7.8144 6.1608 10.0984   |
| 66 | C65 12.0737 3.6900 9.9994  | C65 11.3650 4.9205 10.0028 | C65 12.0634 3.6900 10.0368  | C64 9.2349 6.1523 10.0270   | C63 9.9454 4.9223 10.0120   | C62 7.1018 7.3922 10.0506   |
| 67 | C66 11.3650 4.9209 10.0010 | C66 7.8126 8.6126 10.0028  | C66 11.3597 4.9223 10.0294  | C65 12.0733 3.6905 10.0216  | C64 9.2350 6.1529 10.0170   | C63 9.9555 4.9223 10.0738   |
| 68 | C67 7.8122 8.6128 10.0010  | C67 7.1012 9.8414 9.9990   | C67 7.8133 8.6108 10.0034   | C66 11.3643 4.9209 10.0242  | C65 12.0718 3.6902 10.0026  | C64 9.2415 6.1589 10.0744   |
| 69 | C68 7.1008 9.8414 9.9986   | C68 9.9438 7.3822 10.0028  | C68 7.1039 9.8405 10.0118   | C67 7.8132 8.6128 10.0302   | C66 11.3629 4.9202 10.0042  | C65 12.0793 3.6881 10.0244  |
| 70 | C69 9.9441 7.3819 10.0010  | C69 9.2326 8.6113 10.0006  | C69 9.9418 7.3819 10.0034   | C68 7.1018 9.8416 10.0290   | C67 7.8118 8.6136 10.0142   | C66 11.3725 4.9201 10.0382  |
| 71 | C70 9.2325 8.6112 9.9994   | C70 12.0735 6.1508 9.9990  | C70 9.2326 8.6113 9.9980    | C69 9.9435 7.3820 10.0278   | C68 7.1001 9.8423 10.0078   | C67 7.8145 8.6190 10.0286   |
| 72 | C71 12.0733 6.1512 9.9986  | C71 11.3635 7.3805 9.9990  | C71 12.0695 6.1537 10.0264  | C70 9.2330 8.6112 10.0292   | C69 9.9417 7.3825 10.0080   | C68 7.1005 9.8439 10.0062   |
| 73 | C72 11.3638 7.3802 9.9986  | C72 6.3913 3.6900 12.2540  | C72 11.3614 7.3824 10.0118  | C71 12.0732 6.1511 10.0262  | C70 9.2317 8.6115 10.0076   | C69 9.9482 7.3871 10.0388   |
| 74 |                            |                            | Na1 6.3913 3.6900 12.2692   | C72 11.3632 7.3804 10.0266  | C71 12.0701 6.1504 10.0032  | C70 9.2346 8.6153 10.0252   |
| 75 |                            |                            |                             | Na1 5.3302 4.3120 14.6772   | C72 11.3607 7.3793 10.0038  | C71 12.0771 6.1515 10.0148  |
| 76 |                            |                            |                             |                             | Na1 4.9820 3.6901 14.6692   | C72 11.3668 7.3817 10.0150  |
| 77 |                            |                            |                             |                             |                             | Na1 7.4584 4.2953 14.6346   |
